# Supplementary material for: Insect Antimicrobial Peptides as Guardians of Immunity and Beyond: A Review
Source: Int J Mol Sci. 2024 Mar 29;25(7):3835. doi: 10.3390/ijms25073835 (PMC11011964; doi:10.3390/ijms25073835)
Supplement: Supplementary file 1 [file ijms-25-03835-s001.zip › Table S1.xlsx]

## Sheet: Sheet1
Gene	Accession	Description	Reference
abaecin	NP_001011617.1	NP_001011617.1 abaecin precursor [Apis mellifera]	Immune pathways and defence mechanisms in Blackwell Publishing Ltd honey bees Apis mellifera
abaecin	XP_043604743.1	XP_043604743.1 abaecin [Bombus pyrosoma]	PRJNA759419
abaecin	XP_003394701.1	XP_003394701.1 abaecin [Bombus terrestris]	PRJNA839043
abaecin	AAQ90411.1	AAQ90411.1 abaesin [Bombus ignitus]	Molecular cloning and expression of abaesin gene from bee, Bombus ignitus
abaecin	XP_003491544.1	XP_003491544.1 abaecin [Bombus impatiens]	PRJNA70395
abaecin	ACH90411.1	ACH90411.1 abaecin [Apis cerana cerana]	Antimicrobial peptide evolution in the Asiatic honey bee Apis cerana
abaecin	XP_011049187.1	XP_011049187.1 PREDICTED: abaecin-like [Acromyrmex echinatior]	PRJNA271903
abaecin	KYM77085.1	KYM77085.1 Abaecin [Atta colombica]	PRJNA292624
apidaecin	NP_001011613.1	NP_001011613.1 apidaecin 2 [Apis mellifera]	Immune pathways and defence mechanisms in Blackwell Publishing Ltd honey bees Apis mellifera
apidaecin	NP_001011642.1	NP_001011642.1 apidaecins 1 [Apis mellifera]	Immune pathways and defence mechanisms in Blackwell Publishing Ltd honey bees Apis mellifera
apidaecin	ACH96373.1	ACH96373.1 apidaecin [Apis cerana cerana]	Antimicrobial peptide evolution in the Asiatic honey bee Apis cerana
apidaecin	XP_050599008.1	XP_050599008.1 apidaecins type 14-like isoform X1 [Bombus affinis]	PRJNA880876
apidaecin	XP_031826722.1	XP_031826722.1 apidaecins type 22-like [Nomia melanderi]	PRJNA598198
apidaecin	XP_012347972.1	XP_012347972.1 apidaecins type 22 isoform X1 [Apis florea]	PRJNA86991
apisimin	NP_001011582.1	NP_001011582.1 apisimin precursor [Apis mellifera]	Immune pathways and defence mechanisms in Blackwell Publishing Ltd honey bees Apis mellifera
apisimin	XP_006617609.1	XP_006617609.1 apisimin [Apis dorsata]	PRJNA232132
apisimin	XP_003692391.1	XP_003692391.1 apisimin [Apis florea]	PRJNA86991
apisimin	XP_043800200.1	XP_043800200.1 apisimin [Apis laboriosa]	PRJNA764244
apisimin	AAP33392.1	AAP33392.1 apisimin [Apis cerana cerana]	Isolation and characterization of major royal jelly cDNAs and proteins of the honey bee (Apis cerana)
attacin	NP_523745.1	NP_523745.1 Attacin-A [Drosophila melanogaster]	Gene Model Annotations for Drosophila melanogaster: Impact of High-Throughput Data
attacin	NP_523746.1	NP_523746.1 Attacin-B, isoform A [Drosophila melanogaster]	Gene Model Annotations for Drosophila melanogaster: Impact of High-Throughput Data
attacin	NP_523729.3	NP_523729.3 Attacin-C [Drosophila melanogaster]	Gene Model Annotations for Drosophila melanogaster: Impact of High-Throughput Data
attacin	NP_524391.2	NP_524391.2 Attacin-D [Drosophila melanogaster]	Gene Model Annotations for Drosophila melanogaster: Impact of High-Throughput Data
attacin	ADR51155.1	ADR51155.1 attacin, partial [Helicoverpa armigera]	Immune response of Helicoverpa armigera to different kinds of pathogens
attacin	XP_001809216.1	XP_001809216.1 attacin 1 [Tribolium castaneum]	PRJNA15718
attacin	XP_001809637.1	XP_001809637.1 attacin 2 [Tribolium castaneum]	PRJNA15718
attacin	XP_315630.2	XP_315630.2 attacin [Anopheles gambiae str. PEST]	The Anopheles gambiae genome: an update
attacin	ADB08384.1	ADB08384.1 attacin [Bombyx mori]	Characterization of a Bombyx mori cDNA encoding a novel member of the attacin family of insect antibacterial proteins.
attacin	NP_001037006.1	NP_001037006.1 attacin precursor [Bombyx mori]	A genome-wide analysis of genes and gene families involved in innate immunity of Bombyx mori
attacin	XP_004926758.1	XP_004926758.1 attacin-like [Bombyx mori]	PRJNA679031
attacin	AAY82587.1	AAY82587.1 attacin-1 [Manduca sexta]	A genome-wide analysis of antimicrobial effector genes and their transcription patterns in Manduca sexta
attacin	CAL25130.1	CAL25130.1 attacin II [Manduca sexta]	A genome-wide analysis of antimicrobial effector genes and their transcription patterns in Manduca sexta
attacin	XP_030038350.1	XP_030038350.1 attacin-E [Manduca sexta]	A genome-wide analysis of antimicrobial effector genes and their transcription patterns in Manduca sexta
attacin	XP_037916366.1	XP_037916366.1 attacin-A-like [Hermetia illucens]	PRJNA683030
attacin	AAD09288.1	AAD09288.1 putative attacin [Hyphantria cunea]	Isolation and characterization of immune-related genes from the fall webworm, Hyphantria cunea, using PCR-based differential display and subtractive cloning
attacin	AAY59540.1	AAY59540.1 attacin [Musca domestica]	Molecular cloning and expression of Attacin from housefly (Musca domestica)
attacin	AAC47327.1	AAC47327.1 preproattacin A [Trichoplusia ni]	Trichoplusia ni attacin A, a differentially displayed insect gene coding for an antibacterial protein
bomanin	NP_611319.1	NP_611319.1 bomanin short 1 [Drosophila melanogaster]	Gene Model Annotations for Drosophila melanogaster: Impact of High-Throughput Data
bomanin	NP_611318.2	NP_611318.2 bomanin bicipital 1 [Drosophila melanogaster]	Gene Model Annotations for Drosophila melanogaster: Impact of High-Throughput Data
bomanin	XP_002004807.2	XP_002004807.2 bomanin Bicipital 1 [Drosophila mojavensis]	PRJNA728747
bomanin	XP_002004811.1	XP_002004811.1 bomanin Short 3 [Drosophila mojavensis]	PRJNA728747
bomanin	XP_002091938.1	XP_002091938.1 bomanin Bicipital 1 [Drosophila yakuba]	PRJNA695779
bomanin	XP_002082071.1	XP_002082071.1 bomanin Short 1 [Drosophila simulans]	PRJNA695671
bomanin	XP_017044714.1	XP_017044714.1 bomanin Short 2-like isoform X1 [Drosophila ficusphila]	PRJNA728747
bomanin	XP_039483524.1	XP_039483524.1 bomanin Short 1-like isoform X1 [Drosophila santomea]	PRJNA702481
bomanin	XP_051860752.1	XP_051860752.1 bomanin Bicipital 1-like isoform X1 [Drosophila albomicans]	PRJNA630751
bomanin	XP_034098344.1	XP_034098344.1 bomanin Short 3 [Drosophila albomicans]	PRJNA630751
bomanin	XP_001986981.1	XP_001986981.1 bomanin Bicipital 1 [Drosophila grimshawi]	PRJNA728747
bomanin	XP_001986984.1	XP_001986984.1 bomanin Short 3 [Drosophila grimshawi]	PRJNA728747
bomanin	XP_001959225.1	XP_001959225.1 bomanin Bicipital 1 [Drosophila ananassae]	PRJNA765704
bomanin	XP_001959223.1	XP_001959223.1 bomanin Short 2 [Drosophila ananassae]	PRJNA765704
cecropin	NP_524588.1	NP_524588.1 cecropin A1 [Drosophila melanogaster]	Gene Model Annotations for Drosophila melanogaster: Impact of High-Throughput Data
cecropin	NP_524589.1	NP_524589.1 cecropin A2 [Drosophila melanogaster]	Gene Model Annotations for Drosophila melanogaster: Impact of High-Throughput Data
cecropin	NP_524590.1	NP_524590.1 cecropin B [Drosophila melanogaster]	Gene Model Annotations for Drosophila melanogaster: Impact of High-Throughput Data
cecropin	NP_524591.1	NP_524591.1 cecropin C [Drosophila melanogaster]	Gene Model Annotations for Drosophila melanogaster: Impact of High-Throughput Data
cecropin	ADR51154.1	ADR51154.1 cecropin 1 [Helicoverpa armigera]	Immune response of Helicoverpa armigera to different kinds of pathogens
cecropin	ADR51147.1	ADR51147.1 cecropin 2 [Helicoverpa armigera]	Immune response of Helicoverpa armigera to different kinds of pathogens
cecropin	ADR51148.1	ADR51148.1 cecropin 3 [Helicoverpa armigera]	Immune response of Helicoverpa armigera to different kinds of pathogens
cecropin	AAF22649.1	AAF22649.1 cecropin A [Anopheles gambiae]	Cloning and analysis of a cecropin gene from the malaria vector mosquito, Anopheles gambiae
cecropin	XP_311223.2	XP_311223.2 AGAP000693-PA cecropin A [Anopheles gambiae str. PEST]	The genome sequence of the malaria mosquito Anopheles gambiae
cecropin	XP_040173530.1	XP_040173530.1 cecropin-B [Anopheles arabiensis]	PRJNA716336
cecropin	XP_311222.4	XP_311222.4 AGAP000692-PA [Anopheles gambiae str. cecropin c PEST]	The genome sequence of the malaria mosquito Anopheles gambiae
cecropin	XP_311224.2	XP_311224.2 AGAP000694-PA [Anopheles gambiae str. cecropin B PEST]	The genome sequence of the malaria mosquito Anopheles gambiae
cecropin	XP_565481.2	XP_565481.2 AGAP006722-PA [Anopheles gambiae str. cecropin 4 PEST]	The genome sequence of the malaria mosquito Anopheles gambiae
cecropin	KAG6465021.1	KAG6465021.1 Cecropin1 [Manduca sexta]	A genome-wide analysis of antimicrobial effector genes and their transcription patterns in Manduca sexta
cecropin	KAG6465222.1	KAG6465222.1 Cecropin3 [Manduca sexta]	A genome-wide analysis of antimicrobial effector genes and their transcription patterns in Manduca sexta
cecropin	AAO74638.1	AAO74638.1 Cecropin 6 [Manduca sexta]	A genome-wide analysis of antimicrobial effector genes and their transcription patterns in Manduca sexta
cecropin	NP_001037462.1	NP_001037462.1 cecropin-A precursor [Bombyx mori]	Expression profiling of Bombyx mori gloverin2 gene and its synergistic antifungal effect with cecropin A against Beauveria bassiana
cecropin	NP_001037460.1	NP_001037460.1 cecropin-B precursor [Bombyx mori]	A genome-wide analysis of genes and gene families involved in innate immunity of Bombyx mori
cecropin	BAL70382.1	BAL70382.1 cecropin-D precursor [Bombyx mori]	BmEts upregulates promoter activity of lebocin in Bombyx mori
cecropin	NP_001037392.1	NNP_001037392.1 cecropin-E [Bombyx mori]	A genome-wide analysis of genes and gene families involved in innate immunity of Bombyx mori
cecropin	AAA29187.1	AAA29187.1 cecropin B precursor [Hyalophora cecropia]	On the primary structures of lysozyme, cecropins and attacins from Hyalophora cecropia
cecropin	XP_005179702.1	XP_005179702.1 PREDICTED: cecropin-A2 [Musca domestica]	PRJNA210139
cecropin	BAD66670.1	BAD66670.1 cecropin precursor [Acalolepta luxuriosa]	Purification and cDNA cloning of a cecropin from the longicorn beetle, Acalolepta luxuriosa
cecropin	XP_049538569.1	XP_049538569.1 cecropin-B [Anopheles darlingi]	PRJNA862536
cecropin	KAF7278228.1	KAF7278228.1 cecropin [Rhynchophorus ferrugineus]	PRJNA599933
cecropin	ACI30166.1	ACI30166.1 cecropin [Anopheles darlingi]	The salivary gland transcriptome of the neotropical malaria vector Anopheles darlingi reveals accelerated evolution of genes relevant to hematophagy
cobatoxin	ADR51150.1	ADR51150.1 cobatoxin [Helicoverpa armigera]	Immune response of Helicoverpa armigera to different kinds of pathogens
cobatoxin	XP_026763659.2	XP_026763659.2 cobatoxin [Galleria mellonella]	PRJNA914685
cobatoxin	AAP69839.1	AAP69839.1 cobatoxin [Spodoptera frugiperda]	Characterization and transcriptional profiles of three Spodoptera frugiperda genes encoding cysteine-rich peptides. A new class of defensin-like genes from lepidopteran insects?
cobatoxin	AKJ54497.1	AKJ54497.1 cobatoxin A [Spodoptera exigua]	Dissimilar Regulation of Antimicrobial Proteins in the Midgut of Spodoptera exigua Larvae Challenged with Bacillus thuringiensis Toxins or Baculovirus
coleoptericin	XP_008199794.1	XP_008199794.1 PREDICTED: coleoptericin [Tribolium castaneum]	Comparative genomic analysis of the Tribolium immune system
coleoptericin	XP_008199791.1	XP_008199791.1 PREDICTED: coleoptericin-like [Tribolium castaneum]	Comparative genomic analysis of the Tribolium immune system
coleoptericin	AII26033.1	AII26033.1 coleoptericin C [Tenebrio molitor]	Upregulation of coleoptericin transcription in Tenebrio molitor parasitized by Scleroderma guani
coleoptericin	AII26031.1	AII26031.1 coleoptericin A [Tenebrio molitor]	Upregulation of coleoptericin transcription in Tenebrio molitor parasitized by Scleroderma guani
coleoptericin	AII26032.1	AII26032.1 coleoptericin B [Tenebrio molitor]	Upregulation of coleoptericin transcription in Tenebrio molitor parasitized by Scleroderma guani
coleoptericin	ABP97088.1	ABP97088.1 coleoptericin [Copris tripartitus]	Isolation and molecular cloning of cDNA for an inducible antibacterial protein of larvae of beetle, Copris tripartitus
coleoptericin	QTE04364.1	QTE04364.1 coleoptericin [Lasioderma serricorne]	Yan,Y.,submitted in 2021
coleoptericin	KAI7815323.1	KAI7815323.1 coleoptericin [Rhyzopertha dominica]	The Genome of Rhyzopertha dominica (Fab.) (Coleoptera:Bostrichidae): Adaptation for Success
coleoptericin	APX53000.1	APX53000.1 coleoptericin [Anatolica polita]	Xu et al., submitted in 2016
coleoptericin	WAQ69868.1	WAQ69868.1 coleoptericin [Rhynchophorus ferrugineus]	Hussain et al.,submitted in 2022
coleoptericin	KAI4469277.1	KAI4469277.1 coleoptericin [Holotrichia oblita]	PRJNA812706
coleoptericin	ABZ80667.1	ABZ80667.1 coleoptericin 2 [Sitophilus zeamais]	Identification of the weevil immune genes and their expression in the bacteriome tissue
coleoptericin	BAB40437.1	BAB40437.1 coleoptericin B [Trypoxylus dichotomus]	Purification, characterization and gene expression of a glycine and proline-rich antibacterial protein family from larvae of a beetle Allomyrina dichotoma
defensin	NP_523672.1	NP_523672.1 defensin [Drosophila melanogaster]	Gene Model Annotations for Drosophila melanogaster: Impact of High-Throughput Data
defensin	XP_557449.3	XP_557449.3 defensin [Anopheles gambiae str. PEST]	The genome sequence of the malaria mosquito Anopheles gambiae
defensin	NP_001011616.1	NP_001011616.1 defensin 1 [Apis mellifera]	Immune pathways and defence mechanisms in Blackwell Publishing Ltd honey bees Apis mellifera
defensin	NP_001011638.1	NP_001011638.1 defensin-2 [Apis mellifera]	Immune pathways and defence mechanisms in Blackwell Publishing Ltd honey bees Apis mellifera
defensin	XP_973575.3	XP_973575.3 PREDICTED: tenecin defensin 1[Tribolium castaneum]	Comparative genomic analysis of the Tribolium immune system
defensin	XP_968237.2	XP_968237.2 PREDICTED: tenecin defensin 2 [Tribolium castaneum]	Comparative genomic analysis of the Tribolium immune system
defensin	XP_967194.1	XP_967194.1 PREDICTED: holotricin-1 defensin 3 [Tribolium castaneum]	Comparative genomic analysis of the Tribolium immune system
defensin	AAQ90412.1	AAQ90412.1 defensin [Bombus ignitus]	Cloning and expression profiling of four antibacterial peptide genes from the bumblebee Bombus ignitus
defensin	NP_001267838.1	NP_001267838.1 defensin precursor [Bombus terrestris]	Dynamics of immune system gene expression upon bacterial challenge and wounding in a social insect (Bombus terrestris)
defensin	XP_003486350.2	XP_003486350.2 defensin-1 [Bombus impatiens]	PRJNA70395
defensin	ACH96384.1	ACH96384.1 defensin [Apis cerana cerana]	Antimicrobial peptide evolution in the Asiatic honey bee Apis cerana
defensin	KYM75889.1	KYM75889.1 Defensin-2 [Atta colombica]	PRJNA292624
defensin	XP_011055302.1	XP_011055302.1 PREDICTED: defensin-2 [Acromyrmex echinatior]	PRJNA271903
diapausin	ALP00204.1	diapausin-1_ALP00204.1_Manduca-sexta	A genome-wide analysis of antimicrobial effector genes and their transcription patterns in Manduca sexta
diapausin	KAG6465310.1	diapausin-A_KAG6465310.1_Manduca-sexta	A genome-wide analysis of antimicrobial effector genes and their transcription patterns in Manduca sexta
diapausin	KAG6439341.1	diapausin-2_KAG6439341.1_Manduca-sexta	A genome-wide analysis of antimicrobial effector genes and their transcription patterns in Manduca sexta
diapausin	Q8T0W8.1	diapausin_Q8T0W8.1_Gastrophysa-atrocyanea	Expression profiling of a diapause-specific peptide (DSP) of the leaf beetle Gastrophysa atrocyanea and silencing of DSP by double-strand RNA
diapausin	P0DQJ0.1	diapausin_P0DQJ0.1_Machimus arthriticus	A Dipteran's Novel Sucker Punch: Evolution of Arthropod Atypical Venom with a Neurotoxic Component in Robber Flies (Asilidae, Diptera)
diapausin	P83411.1	diapausin_P83411.1_Spodoptera-littoralis	Characterization and regulation of expression of an antifungal peptide from hemolymph of an insect, Manduca sexta
diapausin	ODM92813.1	diapausin_ODM92813.1_Orchesella-cincta	Gene Family Evolution Reflects Adaptation to Soil Environmental Stressors in the Genome of the Collembolan Orchesella cincta
diapausin	diapausin_Sinella-curviseta	diapausin_Sinella-curviseta	Diversity of the Antimicrobial Peptide Genes in Collembola
diapausin	diapausin_Sminthurus-viridis	diapausin_Sminthurus-viridis	Diversity of the Antimicrobial Peptide Genes in Collembola
diapausin	diapausin_Anurida-maritima	diapausin_Anurida-maritima	Diversity of the Antimicrobial Peptide Genes in Collembola
diapausin	diapausin_Holacanthella-duospinosa	diapausin_Holacanthella-duospinosa	Diversity of the Antimicrobial Peptide Genes in Collembola
diapausin	BAB88222.1	diapausin_BAB88222.1_Gastrophysa-atrocyanea	Expression profiling of a diapause-specific peptide (DSP) of the leaf beetle Gastrophysa atrocyanea and silencing of DSP by
diapausin	P0DQJ0	diapausin_P0DQJ0_Machimus-arthriticus	A Dipteran's Novel Sucker Punch: Evolution of Arthropod Atypical Venom with a Neurotoxic Component in Robber Flies (Asilidae, Diptera)
diptericin	NP_476808.1	NP_476808.1 diptericin A [Drosophila melanogaster]	Gene Model Annotations for Drosophila melanogaster: Impact of High-Throughput Data
diptericin	NP_523787.2	NP_523787.2 diptericin B [Drosophila melanogaster]	Gene Model Annotations for Drosophila melanogaster: Impact of High-Throughput Data
diptericin	XP_002050948.1	XP_002050948.1 diptericin A isoform X1 [Drosophila virilis]	PRJNA501994
diptericin	XP_002004868.1	XP_002004868.1 diptericin A [Drosophila mojavensis]	PRJNA728747
diptericin	XP_034108291.1	XP_034108291.1 diptericin A-like [Drosophila albomicans]	PRJNA630751
diptericin	XP_023160366.1	XP_023160366.1 diptericin A [Drosophila hydei]	PRJNA501994
diptericin	XP_002050946.2	XP_002050946.2 diptericin-A [Drosophila virilis]	PRJNA501994
diptericin	P18684.1	sp|P18684.1|Diptericin-D [Phormia terraenovae]	Insect immunity. The inducible antibacterial peptide diptericin carries two O-glycans necessary for biological activity
diptericin	XP_002004865.1	XP_002004865.1 diptericin [Drosophila mojavensis]	PRJNA728747
diptericin	XP_021958365.1	XP_021958365.1 diptericin-D [Folsomia candida]	PRJNA397071
diptericin	RXG71915.1	RXG71915.1 diptericin [Armadillidium vulgare]	The genome of Armadillidium vulgare (Crustacea, Isopoda) provides insights into sex chromosome evolution in the context of cytoplasmic sex determination
diptericin	GBM62980.1	GBM62980.1 diptericin [Araneus ventricosus]	1000 spider silkomes: Linking sequences to silk physical properties
diptericin	dipterici_Orchesella-cincta	dipterici_Orchesella-cincta	Diversity of the Antimicrobial Peptide Genes in Collembola
drosocin	NP_523744.1	NP_523744.1 drosocin, isoform A [Drosophila melanogaster]	Gene Model Annotations for Drosophila melanogaster: Impact of High-Throughput Data
drosocin	NP_001246324.1	NP_001246324.1 drosocin, isoform B [Drosophila melanogaster]	Gene Model Annotations for Drosophila melanogaster: Impact of High-Throughput Data
drosocin	XP_002081537.1	XP_002081537.1 drosocin [Drosophila simulans]	PRJNA695671
drosocin	XP_002091345.1	XP_002091345.1 drosocin [Drosophila yakuba]	PRJNA695779
drosocin	XP_017024457.1	XP_017024457.1 drosocin [Drosophila kikkawai]	PRJNA670404
drosocin	XP_016929796.1	XP_016929796.1 drosocin [Drosophila suzukii]	PRJNA670404
drosocin	XP_001960757.1	XP_001960757.1 drosocin [Drosophila ananassae]	PRJNA765704
drosocin	XP_017094041.2	XP_017094041.2 drosocin [Drosophila bipectinata]	PRJNA728747
drosocin	XP_017068775.1	XP_017068775.1 drosocin [Drosophila eugracilis]	PRJNA728747
drosocin	XP_016975022.1	XP_016975022.1 drosocin [Drosophila rhopaloa]	PRJNA728747
drosocin	XP_016946682.1	XP_016946682.1 drosocin [Drosophila biarmipes]	PRJNA325502
drosomycin	NP_523901.1	NP_523901.1 drosomycin [Drosophila melanogaster]	Gene Model Annotations for Drosophila melanogaster: Impact of High-Throughput Data
drosomycin	NP_728872.1	NP_728872.1 Drosomycin-like 1 [Drosophila melanogaster]	Gene Model Annotations for Drosophila melanogaster: Impact of High-Throughput Data
drosomycin	AAF47756.2	AAF47756.2 Drosomycin-like 2 [Drosophila melanogaster]	Gene Model Annotations for Drosophila melanogaster: Impact of High-Throughput Data
drosomycin	NP_728861.1	NP_728861.1 Drosomycin-like 3 [Drosophila melanogaster]	Gene Model Annotations for Drosophila melanogaster: Impact of High-Throughput Data
drosomycin	NP_728862.1	NP_728862.1 Drosomycin-like 4 [Drosophila melanogaster]	Gene Model Annotations for Drosophila melanogaster: Impact of High-Throughput Data
drosomycin	AAF47757.1	AAF47757.1 Drosomycin-like 5 [Drosophila melanogaster]	Gene Model Annotations for Drosophila melanogaster: Impact of High-Throughput Data
drosomycin	AAF47765.1	AAF47765.1 Drosomycin-like 6 [Drosophila melanogaster]	Gene Model Annotations for Drosophila melanogaster: Impact of High-Throughput Data
drosomycin	XP_016030223.1	XP_016030223.1 drosomycin [Drosophila simulans]	PRJNA695671
drosomycin	XP_017021162.1	XP_017021162.1 drosomycin-like isoform X1 [Drosophila kikkawai]	PRJNA728747
drosomycin	XP_002093554.1	XP_002093554.1 drosomycin [Drosophila yakuba]	PRJNA695779
drosomycin	XP_043648418.1	XP_043648418.1 drosomycin [Drosophila teissieri]	PRJNA702484
drosomycin	XP_028141333.1	XP_028141333.1 drosomycin-like [Diabrotica virgifera virgifera]	PRJNA862183
drosomycin	XP_033216848.1	XP_033216848.1 drosomycin-like [Belonocnema kinseyi]	PRJNA623416
drosomycin	XP_025835506.1	XP_025835506.1 drosomycin-like [Agrilus planipennis]	PRJNA343475
gallerimycin	XP_021182744.2	XP_021182744.2 gallerimycin-like [Helicoverpa armigera]	Immune response of Helicoverpa armigera to different kinds of pathogens
gallerimycin	AAM46728.1	AAM46728.1 antifungal peptide gallerimycin [Galleria mellonella]	Cloning and expression of gallerimycin, an antifungal peptide expressed in immune response of greater wax moth larvae, Galleria mellonella
gallerimycin	BAG12297.1	BAG12297.1 gallerimycin [Samia ricini]	Cloning and expression of a gene encoding gallerimycin, a cysteine-rich antifungal peptide, from eri-silkworm, Samia cynthia ricini
gallerimycin	AKJ54495.1	AKJ54495.1 gallerimycin [Spodoptera exigua]	Dissimilar Regulation of Antimicrobial Proteins in the Midgut of Spodoptera exigua Larvae Challenged with Bacillus thuringiensis Toxins or Baculoviru
gallerimycin	ABV68855.1	ABV68855.1 gallerimycin [Trichoplusia ni]	Immune system responses and fitness costs associated with consumption of bacteria in larvae of Trichoplusia ni
gallerimycin	AEE37278.1	AEE37278.1 gallerimycin [Spodoptera litura]	Zhang et al., submitted in 2019
gallerimycin	AAP69838.1	AAP69838.1 gallerimycin [Spodoptera frugiperda]	Characterization and transcriptional profiles of three Spodoptera frugiperda genes encoding cysteine-rich peptides. A new class of defensin-like genes from lepidopteran insects?
gallerimycin	WLJ59026.1	WLJ59026.1 gallerimycin [Mythimna separata]	Wang and Fan, submitted in 2023
gallerimycin	XP_050362956.1	XP_050362956.1 gallerimycin-like [Nymphalis io]	PRJNA874736
gallerimycin	XP_053600253.1	XP_053600253.1 gallerimycin-like [Plodia interpunctella]	PRJNA934418
gallerimycin	WJG69181.1	WJG69181.1 gallerimycin 2 [Dioryctria sylvestrella]	Guo, submitted in 2023
gambicin	ACA05604.1	ACA05604.1 gambicin [Anopheles gambiae]	The molecular evolution of four anti-malarial immune genes in the Anopheles gambiae species complex
gambicin	ADG03635.1	ADG03635.1 gambicin [Anopheles coluzzii]	Low linkage disequilibrium in wild Anopheles gambiae s.l.populations
gambicin	ETN57788.1	ETN57788.1 gambicin [Anopheles darlingi]	The molecular evolution of four anti-malarial immune genes in the Anopheles gambiae species complex
gambicin	ACA05622.1	ACA05622.1 gambicin [Anopheles merus]	The molecular evolution of four anti-malarial immune genes in the Anopheles gambiae species complex
gambicin	ACA05632.1	ACA05632.1 gambicin [Anopheles quadriannulatus]	The molecular evolution of four anti-malarial immune genes in the Anopheles gambiae species complex
gambicin	ACA05577.1	ACA05577.1 gambicin, partial [Anopheles arabiensis]	The molecular evolution of four anti-malarial immune genes in the Anopheles gambiae species complex
gambicin	ACA05623.1	ACA05623.1 gambicin [Anopheles merus]	The molecular evolution of four anti-malarial immune genes in the Anopheles gambiae species complex
gambicin	ADG03623.1	ADG03623.1 gambicin [Anopheles coluzzii]	Low linkage disequilibrium in wild Anopheles gambiae s.l.populations
gambicin	AAO38515.1	AAO38515.1 gambicin [Culex pipiens pipiens]	Culex pipiens pipiens: characterization of immune peptides and the influence of immune activation on development of Wuchereria bancrofti
gambicin	ACI30117.1	ACI30117.1 gambicin precursor [Anopheles darlingi]	The salivary gland transcriptome of the neotropical malaria vector Anopheles darlingi reveals accelerated evolution of genes relevant to hematophagy
gloverin	NP_001036930.1	NP_001036930.1 gloverin 1 precursor [Bombyx mori]	A genome-wide analysis of genes and gene families involved in innate immunity of Bombyx mori
gloverin	NP_001037683.1	NP_001037683.1 gloverin 2 precursor [Bombyx mori]	A genome-wide analysis of genes and gene families involved in innate immunity of Bombyx mori
gloverin	NP_001093312.1	NP_001093312.1 gloverin 3 precursor [Bombyx mori]	A genome-wide analysis of genes and gene families involved in innate immunity of Bombyx mori
gloverin	NP_001037684.1	NP_001037684.1 gloverin 4 precursor [Bombyx mori]	A genome-wide analysis of genes and gene families involved in innate immunity of Bombyx mori
gloverin	ADR51146.1	ADR51146.1 gloverin, partial [Helicoverpa armigera]	Immune response of Helicoverpa armigera to different kinds of pathogens
gloverin	CAL25129.1	CAL25129.1 gloverin [Manduca sexta]	A genome-wide analysis of antimicrobial effector genes and their transcription patterns in Manduca sexta
gloverin	ADL27731.1	ADL27731.1 gloverin [Spodoptera exigua]	RNA interference of an antimicrobial peptide, gloverin, of the beet armyworm, Spodoptera exigua, enhances susceptibility to Bacillus thuringiensis
gloverin	ACM69342.1	ACM69342.1 gloverin [Plutella xylostella]	Molecular cloning and characterization of gloverin from the diamondback moth, Plutella xylostella L. and its interaction with bacterial membrane
gloverin	AHC94952.1	AHC94952.1 gloverin [Chilo suppressalis]	Cloning of a gloverin gene from the Asiatic rice borer, Chilo suppressalis
gloverin	AYM26645.1	AYM26645.1 gloverin [Ostrinia furnacalis]	Tang et al., submitted in 2008
gloverin	ABV68856.1	ABV68856.1 gloverin [Trichoplusia ni]	Immune system responses and fitness costs associated with consumption of bacteria in larvae of Trichoplusia ni
gloverin	XP_026764963.2	XP_026764963.2 gloverin [Galleria mellonella]	PRJNA914685
gloverin	WGO77590.1	WGO77590.1 gloverin [Lymantria dispar]	Liu and Wang, submitted in 2022
gloverin	WGJ79126.1	WGJ79126.1 gloverin [Hyphantria cunea]	Yu, submitted in 2022
hymenoptaecin	NP_001011615.1	NP_001011615.1 hymenoptaecin preproprotein [Apis mellifera]	Immune pathways and defence mechanisms in Blackwell Publishing Ltd honey bees Apis mellifera
hymenoptaecin	XP_057340217.1	XP_057340217.1 hymenoptaecin-like [Microplitis mediator]	PRJNA983403
hymenoptaecin	NP_001165829.1	NP_001165829.1 hymenoptaecin-1 isoform 1 precursor [Nasonia vitripennis]	Functional and evolutionary insights from the genomes of three parasitoid Nasonia species
hymenoptaecin	XP_003689742.1	XP_003689742.1 hymenoptaecin [Apis florea]	PRJNA86991
hymenoptaecin	XP_048262934.1	XP_048262934.1 hymenoptaecin-like [Bombus terrestris]	PRJNA839043
hymenoptaecin	ACA04900.1	ACA04900.1 hymenoptaecin [Bombus ignitus]	Cloning and expression profiling of four antibacterial peptide genes from the bumblebee Bombus ignitus
hymenoptaecin	ACH96415.1	ACH96415.1 hymenoptaecin [Apis cerana cerana]	Antimicrobial peptide evolution in the Asiatic honey bee Apis cerana
hymenoptaecin	XP_043793642.1	XP_043793642.1 hymenoptaecin [Apis laboriosa]	PRJNA764244
lebocin	NP_001119732.2	NP_001119732.2 lebocin precursor [Bombyx mori]	A genome-wide analysis of genes and gene families involved in innate immunity of Bombyx mori
lebocin	ACL68097.1	ACL68097.1 lebocin A [Manduca sexta]	A genome-wide analysis of antimicrobial effector genes and their transcription patterns in Manduca sexta
lebocin	ADE20197.1	ADE20197.1 lebocin B [Manduca sexta]	A genome-wide analysis of antimicrobial effector genes and their transcription patterns in Manduca sexta
lebocin	XP_030038912.2	XP_030038912.2 lebocin C [Manduca sexta]	A genome-wide analysis of antimicrobial effector genes and their transcription patterns in Manduca sexta
lebocin	XP_021187065.2	XP_021187065.2 lebocin-4 [Helicoverpa armigera]	High throughput profiling of the cotton bollworm Helicoverpa armigera immunotranscriptome during the fungal and bacterial infections
lebocin	XP_035456692.2	XP_035456692.2 lebocin-4-like [Spodoptera frugiperda]	PRJNA849517
lebocin	XP_022835941.1	XP_022835941.1 lebocin-4-like [Spodoptera litura]	PRJNA416314
lebocin	QWY13033.1	QWY13033.1 lebocin 2 [Mythimna separata]	Rao, submitted in 2020
lebocin	AAG44366.1	AAG44366.1 lebocin precursor [Trichoplusia ni]	Trichoplusia ni lebocin, an inducible immune gene with a downstream insertion element
lebocin	AAS48093.1	AAS48093.1 lebocin [Chrysodeixis includens]	Immune challenge differentially affects transcript abundance of three antimicrobial peptides in hemocytes from the moth Pseudoplusia includens
lebocin	WGJ79130.1	WGJ79130.1 lebocin [Hyphantria cunea]	Yu, submitted in 2022
lebocin	XP_049867602.1	XP_049867602.1 lebocin-4-like [Pectinophora gossypiella]	PRJNA865299
lebocin	AEO21919.1	AEO21919.1 lebocin-like protein [Pieris rapae]	Molecular cloning and induction profiles of a lebocin-like gene in response to granulovirus from the cabbage white butterfly, Pieris rapae
lysozyme	ADR51153.1	ADR51153.1 lysozyme, partial [Helicoverpa armigera]	Immune response of Helicoverpa armigera to different kinds of pathogens
lysozyme	NP_523882.1	NP_523882.1 lysozyme B, isoform A [Drosophila melanogaster]	Gene Model Annotations for Drosophila melanogaster: Impact of High-Throughput Data
lysozyme	NP_476823.1	NP_476823.1 lysozyme D [Drosophila melanogaster]	Gene Model Annotations for Drosophila melanogaster: Impact of High-Throughput Data
lysozyme	NP_476827.2	NP_476827.2 lysozyme E [Drosophila melanogaster]	Gene Model Annotations for Drosophila melanogaster: Impact of High-Throughput Data
lysozyme	NP_001037448.1	NP_001037448.1 lysozyme precursor [Bombyx mori]	A genome-wide analysis of genes and gene families involved in innate immunity of Bombyx mori
lysozyme	NP_001093293.1	NP_001093293.1 lysozyme-like protein 1 precursor [Bombyx mori]	A genome-wide analysis of genes and gene families involved in innate immunity of Bombyx mori
lysozyme	XP_026300526.1	XP_026300526.1 lysozyme [Apis mellifera]	Immune pathways and defence mechanisms in Blackwell Publishing Ltd honey bees Apis mellifera
lysozyme	XP_022123937.1	XP_022123937.1 lysozyme [Pieris rapae]	PRJNA789913
lysozyme	XP_026732891.1	XP_026732891.1 lysozyme [Trichoplusia ni]	PRJNA497582
lysozyme	AAC47326.1	AAC47326.1 lysozyme [Anopheles gambiae]	Analysis of a lysozyme gene from the malaria vector mosquito, Anopheles gambiae
lysozyme	XP_049831130.1	XP_049831130.1 lysozyme c-1-like [Schistocerca gregaria]	PRJNA859116
metchnikowin	NP_523752.1	NP_523752.1 metchnikowin [Drosophila melanogaster]	Gene Model Annotations for Drosophila melanogaster: Impact of High-Throughput Data
metchnikowin	XP_034109149.1	XP_034109149.1 metchnikowin [Drosophila albomicans]	PRJNA630751
metchnikowin	XP_032291545.1	XP_032291545.1 metchnikowin [Drosophila virilis]	PRJNA501994
metchnikowin	XP_002081622.1	XP_002081622.1 metchnikowin [Drosophila simulans]	PRJNA695671
metchnikowin	XP_002092373.1	XP_002092373.1 metchnikowin [Drosophila yakuba]	PRJNA695779
metchnikowin	XP_016953138.1	XP_016953138.1 metchnikowin [Drosophila biarmipes]	PRJNA325502
metchnikowin	XP_052838981.1	XP_052838981.1 metchnikowin [Drosophila gunungcola]	PRJNA922093
metchnikowin	XP_016992782.2	XP_016992782.2 metchnikowin [Drosophila takahashii]	PRJNA728747
metchnikowin	XP_039482517.1	XP_039482517.1 metchnikowin [Drosophila santomea]	PRJNA702481
metchnikowin	XP_033152900.1	XP_033152900.1 metchnikowin [Drosophila mauritiana]	PRJNA12217
metchnikowin	XP_002033971.1	XP_002033971.1 metchnikowin [Drosophila sechellia]	PRJNA609127
moricin	Q86MA1.1	sp|Q86MA1.1|Moricin 1 [Manduca sexta]	A genome-wide analysis of antimicrobial effector genes and their transcription patterns in Manduca sexta
moricin	KAG6450802.1	KAG6450802.1 Moricin 2 [Manduca sexta]	A genome-wide analysis of antimicrobial effector genes and their transcription patterns in Manduca sexta
moricin	NP_001036829.2	NP_001036829.2 moricin-2 precursor [Bombyx mori]	A genome-wide analysis of genes and gene families involved in innate immunity of Bombyx mori
moricin	ADR51149.1	ADR51149.1 moricin [Helicoverpa armigera]	Immune response of Helicoverpa armigera to different kinds of pathogens
moricin	BAC79440.1	BAC79440.1 moricin [Spodoptera litura]	Isolation, gene expression and solution structure of a novel moricin analogue, antibacterial peptide from a lepidopteran insect, Spodoptera litura
moricin	APY23986.1	APY23986.1 moricin [Plutella xylostella]	Cloning and functional identification of moricins from the diamondback moth, Plutella xylostella (L.)
moricin	WGO77591.1	WGO77591.1 moricin [Lymantria dispar]	Liu and Wang, submitted in 2022
moricin	ABQ42573.1	ABQ42573.1 moricin-like peptide A [Galleria mellonella]	The discovery and analysis of a diverged family of novel antifungal moricin-like peptides in the wax moth Galleria mellonella
moricin	WCP86780.1	WCP86780.1 moricin-like peptide 3 [Antheraea pernyi]	Cecropin B and a moricin-like peptide from the Chinese Oak Silkworm, Antheraea pernyi, show antimicrobial activity against Vibrio alginolyticus, Vibrio fluvialis and Vibrio parahaemolyticus
moricin	XP_028156820.1	XP_028156820.1 moricin-like [Ostrinia furnacalis]	PRJNA525080
moricin	AEM66435.1	AEM66435.1 moricin B3 [Bombyx mandarina]	A genome-wide analysis of genes and gene families involved in innate immunity of Bombyx mori
