# Supplementary material for: Insect Antimicrobial Peptides as Guardians of Immunity and Beyond: A Review
Source: Int J Mol Sci. 2024 Mar 29;25(7):3835. doi: 10.3390/ijms25073835 (PMC11011964; doi:10.3390/ijms25073835)
Supplement: Supplementary file 1 [file ijms-25-03835-s001.zip › Table S2.xlsx]

## Sheet: Sheet1
Table S2. Public dataset used for AMP detection. Na, data not avaiable, for genomes, this can happen even if the species has genome assembly but its gene annotation is not available.
Taxonomic Group	Order	Genus, species	TSA Accession or Project Accession	Genome Accession	code in the TREE
Hexapoda	Archaeognatha	Machilis hrabei	GAUM00000000		Machilis
Hexapoda	Archaeognatha	Meinertellus cundinamarcensis	GAUG00000000		Meinerte
Hexapoda	Blattodea3	Blaberus atropos	GAYD00000000		Blaberus
Hexapoda	Blattodea3	Cryptocercus wrighti	GAZN00000000		Cryptoce
Hexapoda	Blattodea3	Periplaneta americana	GAWS00000000		Periplan
Hexapoda	Coleoptera	Aleochara curtula	GATW00000000		Aleochar
Hexapoda	Coleoptera	Carabus granulatus	na	na	Carabus_
Hexapoda	Coleoptera	Dendroctonus ponderosae		GCF_020466585.1	Dendroct
Hexapoda	Coleoptera	Gyrinus marinus	GAUY00000000		Gyrinus_
Hexapoda	Coleoptera	Lepicerus sp. AD-2013	GAZB00000000		Lepiceru
Hexapoda	Coleoptera	Meloe violaceus	GATA00000000		Meloe_vi
Hexapoda	Coleoptera	Priacma serrata	PRJNA181032	na	Priacma_
Hexapoda	Coleoptera	Tribolium castaneum		GCF_000002335.3	TRIBOLIU
Hexapoda	Collembola	Anurida maritima	GAUE00000000		Anurida_
Hexapoda	Collembola	Folsomia candida	GASX00000000		Folsomia
Hexapoda	Collembola	Pogonognathellus sp. AD-2013	GATD00000000		Pogonogn
Hexapoda	Collembola	Sminthurus viridis	GATZ00000000		Sminthur
Hexapoda	Collembola	Tetrodontophora bielanensis	GAXI00000000		Tetrodon
Hexapoda	Dermaptera	Apachyus charteceus	GAUW00000000		Apachyus
Hexapoda	Dermaptera	Forficula auricularia	GAYQ00000000		Forficul
Hexapoda	Diplura	Campodea augens	GAYN00000000		Campodea
Hexapoda	Diplura	Occasjapyx japonicus	GAXJ00000000		Occasjap
Hexapoda	Diptera	Aedes aegypti		GCF_002204515.2	Aedes_AE
Hexapoda	Diptera	Anopheles gambiae		GCF_000005575.2	ANOPHELE
Hexapoda	Diptera	Bibio marci	GATJ00000000		Bibio_ma
Hexapoda	Diptera	Bombylius major	GATI00000000		Bombyliu
Hexapoda	Diptera	Drosophila melanogaster		GCF_000001215.4	DROSOPHI
Hexapoda	Diptera	Glossina morsitans morsitans	PRJNA40877	na	Glossina
Hexapoda	Diptera	Lipara lucens	GAZD00000000		Lipara_l
Hexapoda	Diptera	Phlebotomus papatasi		GCF_024763615.1	Phleboto
Hexapoda	Diptera	Rhagoletis pomonella		GCF_013731165.1	Rhagolet
Hexapoda	Diptera	Sarcophaga crassipalpis	na	na	Sarcopha
Hexapoda	Diptera	Tipula maxima	na	na	Tipula_m
Hexapoda	Diptera	Triarthria setipennis	GAVA00000000		Triarthr
Hexapoda	Diptera	Trichocera saltator	GAXZ00000000		Trichoce
Hexapoda	Embioptera	Aposthonia japonica	GAWU00000000		Aposthon
Hexapoda	Embioptera	Haploembia palaui	GAZA00000000		Haploemb
Hexapoda	Ephemeroptera	Baetis sp. AD-2013	GATU00000000		Baetis_p
Hexapoda	Ephemeroptera	Ephemera danica	GAUK00000000		Ephemera
Hexapoda	Ephemeroptera	Eurylophella sp. AD-2013	GAZG00000000		Euryloph
Hexapoda	Ephemeroptera	Isonychia bicolor	GAXA00000000		Isonychi
Hexapoda	Grylloblattodea	Galloisiana yuasai	GAWN00000000		Galloisi
Hexapoda	Grylloblattodea	Grylloblatta bifratrilecta	GAWP00000000		Gryllobl
Hexapoda	Hemiptera	Acanthocasuarina muellerianae	GAYY00000000		Acanthoc
Hexapoda	Hemiptera	Acanthosoma haemorrhoidale	GAUV00000000		Acanthos
Hexapoda	Hemiptera	Acyrthosiphon pisum		GCF_005508785.2	ACYRTOSI
Hexapoda	Hemiptera	Aphis gossypii		GCF_020184175.1	Aphis_go
Hexapoda	Hemiptera	Bemisia tabaci		GCA_918797505.1	Bemisia_
Hexapoda	Hemiptera	Essigella californica	GAZF00000000		Essigell
Hexapoda	Hemiptera	Notostira elongata	GASV00000000		Notostir
Hexapoda	Hemiptera	Planococcus citri	GAXF00000000		Planococ
Hexapoda	Hemiptera	Ranatra linearis	GAYZ00000000		Ranatra_
Hexapoda	Hemiptera	Trialeurodes vaporariorum	GAWX00000000		Trialeur
Hexapoda	Hemiptera	Velia caprai	GAUO00000000		Velia_ca
Hexapoda	Hemiptera	Xenophysella greensladeae	GAYI00000000		Xenophys
Hexapoda	Hemiptera	Cercopis vulnerata	GAUN00000000		Cercopis
Hexapoda	Hemiptera	Nilaparvata lugens	GAYF00000000		Nilaparv
Hexapoda	Hemiptera	Okanagana villosa	GAWQ00000000		Okanagan
Hexapoda	Hymenoptera	Acromyrmex echinatior	na	na	ACROMYRM
Hexapoda	Hymenoptera	Apis mellifera		GCF_003254395.2	APIS_MEL
Hexapoda	Hymenoptera	Bombus terrestris		GCF_910591885.1	Bombus_t
Hexapoda	Hymenoptera	Chrysis viridula	GATY00000000		Chrysis_
Hexapoda	Hymenoptera	Cotesia vestalis	GAUP00000000		Cotesia_
Hexapoda	Hymenoptera	Exoneura robusta	PRJNA62683	na	Exoneura
Hexapoda	Hymenoptera	Harpegnathos saltator		GCF_003227715.2	Harpegna
Hexapoda	Hymenoptera	Leptopilina clavipes	GAXY00000000		Leptopil
Hexapoda	Hymenoptera	Nasonia vitripennis		GCF_009193385.2	NASONIA_
Hexapoda	Hymenoptera	Orussus abietinus	GAUJ00000000		Orussus_
Hexapoda	Hymenoptera	Tenthredo koehleri	GAWW00000000		Tenthred
Hexapoda	Isoptera	Mastotermes darwiniensis	GAZE00000000		Mastoter
Hexapoda	Isoptera	Prorhinotermes simplex	GASE00000000		Prorhino
Hexapoda	Isoptera	Zootermopsis nevadensis		GCF_000696155.1	ZOOTERMO
Hexapoda	Lepidoptera	Bombyx mori		GCF_014905235.1	BOMBYX_M
Hexapoda	Lepidoptera	Dyseriocrania subpurpurella	GASY00000000		Eriocran
Hexapoda	Lepidoptera	Manduca sexta		GCF_014839805.1	Manduca_
Hexapoda	Lepidoptera	Micropterix calthella	na	na	Micropte
Hexapoda	Lepidoptera	Nemophora degeerella	GATC00000000		Nemophor
Hexapoda	Lepidoptera	Parides eurimedes	GAXH00000000		Parides_
Hexapoda	Lepidoptera	Polyommatus icarus	GAST00000000		Polyomma
Hexapoda	Lepidoptera	Triodia sylvina	GAVB00000000		Triodia_
Hexapoda	Lepidoptera	Yponomeuta evonymellus	GASG00000000		Yponomeu
Hexapoda	Lepidoptera	Zygaena fausta	GAYB00000000		Zygaena_
Hexapoda	Mantodea	Empusa pennata	GAWT00000000		Empusa_p
Hexapoda	Mantodea	Mantis religiosa	GASW00000000		Mantis_r
Hexapoda	Mantodea	Metallyticus splendidus	GATB00000000		Metallyt
Hexapoda	Mantophasmatodea	Tanzaniophasma sp. AD-2013	GAXB00000000		Tanzanio
Hexapoda	Mecoptera	Bittacus pilicornis	GATH00000000		Bittacus
Hexapoda	Mecoptera	Boreus hyemalis	GAYK00000000		Boreus_h
Hexapoda	Mecoptera	Nannochorista philpotti	na	na	Nannocho
Hexapoda	Mecoptera	Panorpa vulgaris	GAUH00000000		Panorpa_
Hexapoda	Megaloptera	Corydalus cornutus	GATG00000000		Corydalu
Hexapoda	Megaloptera	Sialis lutaria	PRJNA181034	na	Sialis_l
Hexapoda	Neuroptera	Conwentzia psociformis	GAYH00000000		Conwentz
Hexapoda	Neuroptera	Euroleon nostras	GAXW00000000		Euroleon
Hexapoda	Neuroptera	Osmylus fulvicephalus	GAYC00000000		Osmylus_
Hexapoda	Neuroptera	Pseudomallada prasinus	GAVV00000000		Dichochr
Hexapoda	Odonata	Calopteryx splendens	GAYM00000000		Calopter
Hexapoda	Odonata	Cordulegaster boltonii	GAYO00000000		Corduleg
Hexapoda	Odonata	Epiophlebia superstes	GAVW00000000		Epiophle
Hexapoda	Orthoptera	Ceuthophilus sp. AD-2013	GAUX00000000		Ceuthoph
Hexapoda	Orthoptera	Gryllotalpa sp. AD-2013	GAWZ00000000		Gryllota
Hexapoda	Orthoptera	Prosarthria teretrirostris	GAZT00000000		Prosarth
Hexapoda	Orthoptera	Stenobothrus lineatus	GAUZ00000000		Stenobot
Hexapoda	Orthoptera	Tetrix subulata	GASQ00000000		Tetrix_s
Hexapoda	Phasmatodea	Aretaon asperrimus	GAZQ00000000		Aretaon_
Hexapoda	Phasmatodea	Peruphasma schultei	GAWJ00000000		Peruphas
Hexapoda	Phasmatodea	Timema cristinae	GAVX00000000		Timema_c
Hexapoda	Plecoptera	Cosmioperla kuna	GAYL00000000		Cosmiope
Hexapoda	Plecoptera	Leuctra sp. AD-2013	GAUF00000000		Leuctra_
Hexapoda	Plecoptera	Perla marginata	GATV00000000		Perla_ma
Hexapoda	Protura	Acerentomon sp. AD-2013	GAXE00000000		Acerento
Hexapoda	Psocodea	Ectopsocus briggsi	GAPT00000000		Ectopsoc
Hexapoda	Psocodea	Liposcelis bostrychophila	GAYV00000000		Liposcel
Hexapoda	Psocodea	Menopon gallinae	GAWR00000000		Menopon_
Hexapoda	Psocodea	Pediculus humanus		GCF_000006295.1	PEDICULU
Hexapoda	Raphidioptera	Inocellia crassicornis	GAZH00000000		Inocelli
Hexapoda	Raphidioptera	Xanthostigma xanthostigma	GAUI00000000		Xanthost
Hexapoda	Siphonaptera	Archaeopsylla erinacei	na	na	Archaeop
Hexapoda	Siphonaptera	Ceratophyllus gallinae	GAWK00000000		Ceratoph
Hexapoda	Siphonaptera	Ctenocephalides felis	GAYP00000000		Ctenocep
Hexapoda	Strepsiptera	Mengenilla moldrzyki	PRJNA181027	na	Mengenil
Hexapoda	Strepsiptera	Stylops melittae	GAZM00000000		Stylops_
Hexapoda	Thysanoptera	Frankliniella cephalica	GAYE00000000		Franklin
Hexapoda	Thysanoptera	Gynaikothrips ficorum	GAXG00000000		Gynaikot
Hexapoda	Thysanoptera	Thrips palmi	GAXC00000000		Thrips_p
Hexapoda	Trichoptera	Annulipalpia sp. AD-2013	GATX00000000		Cheumato
Hexapoda	Trichoptera	Hydroptila sp. AD-2013	GAVM00000000		Hydropti
Hexapoda	Trichoptera	Philopotamus ludificatus	PRJNA181031	na	Philopot
Hexapoda	Trichoptera	Platycentropus radiatus	GASS00000000		Platycen
Hexapoda	Trichoptera	Rhyacophila fasciata	GAXX00000000		Rhyacoph
Hexapoda	Zoraptera	Zorotypus caudelli	GAYA00000000		Zorotypu
Hexapoda	Zygentoma	Atelura formicaria	GAYJ00000000		Atelura_
Hexapoda	Zygentoma	Thermobia domestica	GASN00000000		Thermobi
Hexapoda	Zygentoma	Tricholepidion gertschi	GASO00000000		Trichole

## Sheet: Sheet2
Table S2. Public dataset used for AMP detection. Na, data not avaiable, for genomes, this can happen even if the species has genome assembly but its gene annotation is not available.
Taxonomic Group	Order	Genus, species	TSA Accession or Project Accession	Genome Accession	code in the TREE
Hexapoda	Archaeognatha	Machilis hrabei	GAUM00000000		Machilis
Hexapoda	Archaeognatha	Meinertellus cundinamarcensis	GAUG00000000		Meinerte
Hexapoda	Blattodea3	Blaberus atropos	GAYD00000000		Blaberus
Hexapoda	Blattodea3	Cryptocercus wrighti	GAZN00000000		Cryptoce
Hexapoda	Blattodea3	Periplaneta americana	GAWS00000000		Periplan
Hexapoda	Coleoptera	Aleochara curtula	GATW00000000		Aleochar
Hexapoda	Coleoptera	Carabus granulatus	na	na	Carabus_
Hexapoda	Coleoptera	Dendroctonus ponderosae		GCF_020466585.1	Dendroct
Hexapoda	Coleoptera	Gyrinus marinus	GAUY00000000		Gyrinus_
Hexapoda	Coleoptera	Lepicerus sp. AD-2013	GAZB00000000		Lepiceru
Hexapoda	Coleoptera	Meloe violaceus	GATA00000000		Meloe_vi
Hexapoda	Coleoptera	Priacma serrata	PRJNA181032	na	Priacma_
Hexapoda	Coleoptera	Tribolium castaneum		GCF_000002335.3	TRIBOLIU
Hexapoda	Collembola	Anurida maritima	GAUE00000000		Anurida_
Hexapoda	Collembola	Folsomia candida	GASX00000000		Folsomia
Hexapoda	Collembola	Pogonognathellus sp. AD-2013	GATD00000000		Pogonogn
Hexapoda	Collembola	Sminthurus viridis	GATZ00000000		Sminthur
Hexapoda	Collembola	Tetrodontophora bielanensis	GAXI00000000		Tetrodon
Hexapoda	Dermaptera	Apachyus charteceus	GAUW00000000		Apachyus
Hexapoda	Dermaptera	Forficula auricularia	GAYQ00000000		Forficul
Hexapoda	Diplura	Campodea augens	GAYN00000000		Campodea
Hexapoda	Diplura	Occasjapyx japonicus	GAXJ00000000		Occasjap
Hexapoda	Diptera	Aedes aegypti		GCF_002204515.2	Aedes_AE
Hexapoda	Diptera	Anopheles gambiae		GCF_000005575.2	ANOPHELE
Hexapoda	Diptera	Bibio marci	GATJ00000000		Bibio_ma
Hexapoda	Diptera	Bombylius major	GATI00000000		Bombyliu
Hexapoda	Diptera	Drosophila melanogaster		GCF_000001215.4	DROSOPHI
Hexapoda	Diptera	Glossina morsitans morsitans	PRJNA40877	na	Glossina
Hexapoda	Diptera	Lipara lucens	GAZD00000000		Lipara_l
Hexapoda	Diptera	Phlebotomus papatasi		GCF_024763615.1	Phleboto
Hexapoda	Diptera	Rhagoletis pomonella		GCF_013731165.1	Rhagolet
Hexapoda	Diptera	Sarcophaga crassipalpis	na	na	Sarcopha
Hexapoda	Diptera	Tipula maxima	na	na	Tipula_m
Hexapoda	Diptera	Triarthria setipennis	GAVA00000000		Triarthr
Hexapoda	Diptera	Trichocera saltator	GAXZ00000000		Trichoce
Hexapoda	Embioptera	Aposthonia japonica	GAWU00000000		Aposthon
Hexapoda	Embioptera	Haploembia palaui	GAZA00000000		Haploemb
Hexapoda	Ephemeroptera	Baetis sp. AD-2013	GATU00000000		Baetis_p
Hexapoda	Ephemeroptera	Ephemera danica	GAUK00000000		Ephemera
Hexapoda	Ephemeroptera	Eurylophella sp. AD-2013	GAZG00000000		Euryloph
Hexapoda	Ephemeroptera	Isonychia bicolor	GAXA00000000		Isonychi
Hexapoda	Grylloblattodea	Galloisiana yuasai	GAWN00000000		Galloisi
Hexapoda	Grylloblattodea	Grylloblatta bifratrilecta	GAWP00000000		Gryllobl
Hexapoda	Hemiptera	Acanthocasuarina muellerianae	GAYY00000000		Acanthoc
Hexapoda	Hemiptera	Acanthosoma haemorrhoidale	GAUV00000000		Acanthos
Hexapoda	Hemiptera	Acyrthosiphon pisum		GCF_005508785.2	ACYRTOSI
Hexapoda	Hemiptera	Aphis gossypii		GCF_020184175.1	Aphis_go
Hexapoda	Hemiptera	Bemisia tabaci		GCA_918797505.1	Bemisia_
Hexapoda	Hemiptera	Essigella californica	GAZF00000000		Essigell
Hexapoda	Hemiptera	Notostira elongata	GASV00000000		Notostir
Hexapoda	Hemiptera	Planococcus citri	GAXF00000000		Planococ
Hexapoda	Hemiptera	Ranatra linearis	GAYZ00000000		Ranatra_
Hexapoda	Hemiptera	Trialeurodes vaporariorum	GAWX00000000		Trialeur
Hexapoda	Hemiptera	Velia caprai	GAUO00000000		Velia_ca
Hexapoda	Hemiptera	Xenophysella greensladeae	GAYI00000000		Xenophys
Hexapoda	Hemiptera	Cercopis vulnerata	GAUN00000000		Cercopis
Hexapoda	Hemiptera	Nilaparvata lugens	GAYF00000000		Nilaparv
Hexapoda	Hemiptera	Okanagana villosa	GAWQ00000000		Okanagan
Hexapoda	Hymenoptera	Acromyrmex echinatior	na	na	ACROMYRM
Hexapoda	Hymenoptera	Apis mellifera		GCF_003254395.2	APIS_MEL
Hexapoda	Hymenoptera	Bombus terrestris		GCF_910591885.1	Bombus_t
Hexapoda	Hymenoptera	Chrysis viridula	GATY00000000		Chrysis_
Hexapoda	Hymenoptera	Cotesia vestalis	GAUP00000000		Cotesia_
Hexapoda	Hymenoptera	Exoneura robusta	PRJNA62683	na	Exoneura
Hexapoda	Hymenoptera	Harpegnathos saltator		GCF_003227715.2	Harpegna
Hexapoda	Hymenoptera	Leptopilina clavipes	GAXY00000000		Leptopil
Hexapoda	Hymenoptera	Nasonia vitripennis		GCF_009193385.2	NASONIA_
Hexapoda	Hymenoptera	Orussus abietinus	GAUJ00000000		Orussus_
Hexapoda	Hymenoptera	Tenthredo koehleri	GAWW00000000		Tenthred
Hexapoda	Isoptera	Mastotermes darwiniensis	GAZE00000000		Mastoter
Hexapoda	Isoptera	Prorhinotermes simplex	GASE00000000		Prorhino
Hexapoda	Isoptera	Zootermopsis nevadensis		GCF_000696155.1	ZOOTERMO
Hexapoda	Lepidoptera	Bombyx mori		GCF_014905235.1	BOMBYX_M
Hexapoda	Lepidoptera	Dyseriocrania subpurpurella	GASY00000000		Eriocran
Hexapoda	Lepidoptera	Manduca sexta		GCF_014839805.1	Manduca_
Hexapoda	Lepidoptera	Micropterix calthella	na	na	Micropte
Hexapoda	Lepidoptera	Nemophora degeerella	GATC00000000		Nemophor
Hexapoda	Lepidoptera	Parides eurimedes	GAXH00000000		Parides_
Hexapoda	Lepidoptera	Polyommatus icarus	GAST00000000		Polyomma
Hexapoda	Lepidoptera	Triodia sylvina	GAVB00000000		Triodia_
Hexapoda	Lepidoptera	Yponomeuta evonymellus	GASG00000000		Yponomeu
Hexapoda	Lepidoptera	Zygaena fausta	GAYB00000000		Zygaena_
Hexapoda	Mantodea	Empusa pennata	GAWT00000000		Empusa_p
Hexapoda	Mantodea	Mantis religiosa	GASW00000000		Mantis_r
Hexapoda	Mantodea	Metallyticus splendidus	GATB00000000		Metallyt
Hexapoda	Mantophasmatodea	Tanzaniophasma sp. AD-2013	GAXB00000000		Tanzanio
Hexapoda	Mecoptera	Bittacus pilicornis	GATH00000000		Bittacus
Hexapoda	Mecoptera	Boreus hyemalis	GAYK00000000		Boreus_h
Hexapoda	Mecoptera	Nannochorista philpotti	na	na	Nannocho
Hexapoda	Mecoptera	Panorpa vulgaris	GAUH00000000		Panorpa_
Hexapoda	Megaloptera	Corydalus cornutus	GATG00000000		Corydalu
Hexapoda	Megaloptera	Sialis lutaria	PRJNA181034	na	Sialis_l
Hexapoda	Neuroptera	Conwentzia psociformis	GAYH00000000		Conwentz
Hexapoda	Neuroptera	Euroleon nostras	GAXW00000000		Euroleon
Hexapoda	Neuroptera	Osmylus fulvicephalus	GAYC00000000		Osmylus_
Hexapoda	Neuroptera	Pseudomallada prasinus	GAVV00000000		Dichochr
Hexapoda	Odonata	Calopteryx splendens	GAYM00000000		Calopter
Hexapoda	Odonata	Cordulegaster boltonii	GAYO00000000		Corduleg
Hexapoda	Odonata	Epiophlebia superstes	GAVW00000000		Epiophle
Hexapoda	Orthoptera	Ceuthophilus sp. AD-2013	GAUX00000000		Ceuthoph
Hexapoda	Orthoptera	Gryllotalpa sp. AD-2013	GAWZ00000000		Gryllota
Hexapoda	Orthoptera	Prosarthria teretrirostris	GAZT00000000		Prosarth
Hexapoda	Orthoptera	Stenobothrus lineatus	GAUZ00000000		Stenobot
Hexapoda	Orthoptera	Tetrix subulata	GASQ00000000		Tetrix_s
Hexapoda	Phasmatodea	Aretaon asperrimus	GAZQ00000000		Aretaon_
Hexapoda	Phasmatodea	Peruphasma schultei	GAWJ00000000		Peruphas
Hexapoda	Phasmatodea	Timema cristinae	GAVX00000000		Timema_c
Hexapoda	Plecoptera	Cosmioperla kuna	GAYL00000000		Cosmiope
Hexapoda	Plecoptera	Leuctra sp. AD-2013	GAUF00000000		Leuctra_
Hexapoda	Plecoptera	Perla marginata	GATV00000000		Perla_ma
Hexapoda	Protura	Acerentomon sp. AD-2013	GAXE00000000		Acerento
Hexapoda	Psocodea	Ectopsocus briggsi	GAPT00000000		Ectopsoc
Hexapoda	Psocodea	Liposcelis bostrychophila	GAYV00000000		Liposcel
Hexapoda	Psocodea	Menopon gallinae	GAWR00000000		Menopon_
Hexapoda	Psocodea	Pediculus humanus		GCF_000006295.1	PEDICULU
Hexapoda	Raphidioptera	Inocellia crassicornis	GAZH00000000		Inocelli
Hexapoda	Raphidioptera	Xanthostigma xanthostigma	GAUI00000000		Xanthost
Hexapoda	Siphonaptera	Archaeopsylla erinacei	na	na	Archaeop
Hexapoda	Siphonaptera	Ceratophyllus gallinae	GAWK00000000		Ceratoph
Hexapoda	Siphonaptera	Ctenocephalides felis	GAYP00000000		Ctenocep
Hexapoda	Strepsiptera	Mengenilla moldrzyki	PRJNA181027	na	Mengenil
Hexapoda	Strepsiptera	Stylops melittae	GAZM00000000		Stylops_
Hexapoda	Thysanoptera	Frankliniella cephalica	GAYE00000000		Franklin
Hexapoda	Thysanoptera	Gynaikothrips ficorum	GAXG00000000		Gynaikot
Hexapoda	Thysanoptera	Thrips palmi	GAXC00000000		Thrips_p
Hexapoda	Trichoptera	Annulipalpia sp. AD-2013	GATX00000000		Cheumato
Hexapoda	Trichoptera	Hydroptila sp. AD-2013	GAVM00000000		Hydropti
Hexapoda	Trichoptera	Philopotamus ludificatus	PRJNA181031	na	Philopot
Hexapoda	Trichoptera	Platycentropus radiatus	GASS00000000		Platycen
Hexapoda	Trichoptera	Rhyacophila fasciata	GAXX00000000		Rhyacoph
Hexapoda	Zoraptera	Zorotypus caudelli	GAYA00000000		Zorotypu
Hexapoda	Zygentoma	Atelura formicaria	GAYJ00000000		Atelura_
Hexapoda	Zygentoma	Thermobia domestica	GASN00000000		Thermobi
Hexapoda	Zygentoma	Tricholepidion gertschi	GASO00000000		Trichole
